# Identifying Core Operons in Metagenomic Data

Xiao Hu<sup>1</sup>, Iddo Friedberg<sup>1,2,\*</sup>,

<sup>1</sup>Department of Veterinary Microbiology and Preventive Medicine, Iowa State University, Ames, IA 50011, USA <sup>2</sup>Program in Bioinformatics and Computational Biology, Iowa State University, Ames, IA 50010 USA

\*.idoerg@iastate.edu

## Abstract

An operon is a functional unit of DNA whose genes are co-transcribed on polycistronic mRNA, in a co-regulated fashion. Operons are a powerful mechanism of introducing functional complexity in bacteria, and are therefore of interest in microbial genetics, physiology, biochemistry, and evolution. Here we present a Pipeline for Operon Exploration in Metagenomes or POEM. At the heart of POEM lies the concept of a core operon, a functional unit enabled by a predicted operon in a metagenome. Using a series of benchmarks, we show the high accuracy of POEM, and demonstrate its use on a human gut metagenome sample. We conclude that POEM is a useful tool for analyzing metagenomes beyond the genomic level, and for identifying multi-gene functionalities and possible neofunctionalization in metagenomes. Availability: [https://github.com/Rinoahu/POEM\\_py3k](https://github.com/Rinoahu/POEM_py3k)

## 1 Background

It is estimated that 5-50% of bacterial genes reside in operons [6, 44], and the characterization and understanding of operons is central to bacterial genomic studies. Experimental approaches, chiefly RNA-Seq, are the most reliable way to identify operons; however, it is not feasible to perform experiments to characterize all operons. Over the years, several computational operon-prediction techniques have been developed. Generally, computational operon identification methods include three steps: 1. identify genes that are in an operon and, conversely, genes that do not participate in an operon; 2. identify features typical of each group; 3. train a classifier with these features and build a discriminating model.

Computational operon prediction methods have been developed since the late 1990's (For a comprehensive review see: [46]). Naïve Bayes models have been used since early 2000's for predicting operons [3, 10, 18]. Another method used

14 microarray data to identify the different expression profiles of adjacent gene  
15 pairs in operons and outside of operons. The differential expression profiles and  
16 intergenic distances were used as features to train a Bayesian classifier [35].  
17 Comparative genomic methods were also used to identify operons by detecting  
18 conserved gene clusters across several species [5, 26, 31]. Other methods include  
19 particle swarm optimization [8, 9], and neural networks [39].

20 There are several operon databases that include automated and experimental-  
21 based operon annotation [13, 25, 29, 33, 38]. However, a manual curation method is  
22 not suitable for the rapid growing number of bacterial genomes, few of which are  
23 experimentally assayed for operons. Furthermore, experimental studies tend to  
24 use data from model species, and cross-species prediction may not work well [11].

25 The challenge of discovering operons is compounded when trying to discover  
26 operons in metagenomic data. Major additional confounders include the large  
27 loss of genomic information, short contigs that rarely assemble into a full genome,  
28 and misassembly that might produce chimeric contigs [45]. At the same time,  
29 metagenomic data contain rich information that cannot be gleaned from clonal  
30 cultures; it is therefore necessary to investigate how well we can predict operons  
31 in metagenomic data. Some work has been done including use of proximity and  
32 guilt-by-association [41, 42].

33 While a genome contains the total genetic information of an organism, a  
34 metagenome is a partial snapshot of a population of genomes. We therefore  
35 can rarely expect an operon discovery method to provide the entire content of  
36 operons from metagenomic data. However, predicting whether genes participate  
37 in an operon, and which functions are carried out by operons, provide valuable  
38 additional information to the functional annotation of a metagenome. In this  
39 study we present a method that (1) classifies gene pairs in metagenomes into  
40 “operonic” and “non-operonic” classes, and (2) provides functional annotations for  
41 the operons it reconstructs from metagenomic data. We introduce the concept  
42 of metagenomic *core operons*. A core operon comprises a set of intra-operonic

gene pairs that have orthologs in several species in the metagenome, and are concatenated using guilt-by-association. Additionally, we introduce the *core functions* of operons, which identifies which functions in the metagenome are executed by operons. Commonly, metagenomic analysis pipelines provide the distribution of biological function the metagenome has based on a normalized count of functionally-annotated ORFs. Our method, a Pipeline for Operon Exploration in Metagenomes or POEM, adds more information as it considers the evolutionary conservation of co-transcribed genes in the species constituting the microbial community. This additional information is valuable for understanding the genetic potential of a microbial community introducing structural information in the form of predicted operons.

## Results

We ran POEM on two different data sets. One includes simulated reads generated by ART [15] from 48 genomes of Operon DataBase v2 [29]. The genome species used and parameters of ART are shown in Supplementary Table S1. The second set is the human microbiome set SRR2155174 downloaded from ENA [21]. As a standard of truth for the operons, we used operons from Operon DataBase v2 that are supported by literature (henceforth: “true operons”). This dataset contains 8,194 genes and 5,621 adjacent genes in 2,589 operons.

### Metagenome Assembly and Gene Prediction

We used IDBA-UD, MegaHIT, and Velvet [47] to assemble the simulated and experimental reads; the results are shown in Table 1. IDBA-UD provided the maximal N50 and minimal number of contigs in both datasets. MegaHIT provided the largest genome size and the most protein-coding genes.

Metagenemark found 7,855 genes of the 8,194 true operon genes in the whole genomes. In the simulated reads assembly, the number of genes numbers are 5,116,

| Feature\Assembler              | Simulated Reads |              |              | SRR2155174  |             |            |             |
|--------------------------------|-----------------|--------------|--------------|-------------|-------------|------------|-------------|
|                                | IDBA-UD         | Megahit      | Velvet.51    | IDBA-UD     | Megahit     | Velvet.51  | Assembly    |
| Size (bp)                      | 132,218,137     | 134,341,573  | 100,889,182  | 131,424,989 | 135,150,882 | 85,261,552 | 122,371,235 |
| GC content                     | 49.51%          | 49.55%       | 50.73%       | 48.11%      | 48.19%      | 46.96%     | 48.04%      |
| Number of contigs              | 48,508          | 54,274       | 61,093       | 87,992      | 107,718     | 146,313    | 55,925      |
| Max contig length              | 947,260         | 549,191      | 569,707      | 484,034     | 249,170     | 106,439    | 327,893     |
| Min contig length              | 100             | 200          | 101          | 100         | 200         | 101        | 500         |
| Mean contig length             | 2,725           | 2,475        | 1,651        | 1,493       | 1,254       | 582        | 2,188       |
| N50                            | 12,732          | 7,681        | 9,312        | 4,306       | 2,593       | 906        | 4,331       |
| N90                            | 984             | 888          | 569          | 478         | 426         | 227        | 754         |
| Protein-coding genes           | 154,908         | 162,282      | 133,298      | 175,983     | 190,946     | 170,100    | 147,873     |
| Genes from the True Operon Set | 5,116 (0.62)    | 5,078 (0.62) | 3,530 (0.43) | NA          | NA          | NA         | NA          |

**Table 1.** Main features of simulated and real metagenome assembly. **Size (bp):** size of assemblies without singleton reads; **Genes from the True Operon Set:** genes discovered by the gene calling software, that are found in the True Operon Set (fraction of 8,194 found).

| Genome       | Whole genome |        | IDBA_ud |        | Megahit |        | Velvet |        |
|--------------|--------------|--------|---------|--------|---------|--------|--------|--------|
|              | CNN          | Linear | CNN     | Linear | CNN     | Linear | CNN    | Linear |
| Predictor    | CNN          | Linear | CNN     | Linear | CNN     | Linear | CNN    | Linear |
| Precision(%) | 89.75        | 69.84  | 58.74   | 54.69  | 57.61   | 53.56  | 46.75  | 46.80  |
| Recall(%)    | 89.04        | 98.73  | 51.05   | 55.91  | 48.84   | 53.42  | 37.60  | 41.31  |
| F1 score(%)  | 89.39        | 81.81  | 55.13   | 54.62  | 53.40   | 52.86  | 41.68  | 43.88  |

**Table 2.** Evaluation of operonic adjacency prediction on simulated metagenomes. **CNN:** a convolutional neural network based classifier; **Linear:** a linear classifier that is based on the intergenic distance and strand co-location.

5,078, and 3,530 (out of 8,194) using IDBA, Megahit, and Velvet respectively.

## Operon Prediction and Adjacent Genes Within the Operon

We tested the operon prediction module's performance on whole genomes and simulated metagenome assembly. The 4,425 operonic and 2,097 non-operonic adjacent genes mentioned above were used as a True Positive (TP) set and True Negative (TN) set, respectively. The precision, recall, and  $F_1$  for predicted operonic adjacency are defined in the following equations and the statistical results are shown in Table 2.

$$Precision = \frac{True\ Positives}{True\ Positives + False\ Positives}$$

$$Recall = \frac{True\ Positives}{True\ Positives + False\ Negatives}$$

$$F_1 = 2 \times \frac{Precision \times Recall}{Precision + Recall}$$

However, these results only reflect POEM's performance on classification of operonic and non-operonic adjacency. To further evaluate POEM's performance

| Real Operon             | Whole genome |              | IDBA         |              | Megahit      |              | Velvet     |            |
|-------------------------|--------------|--------------|--------------|--------------|--------------|--------------|------------|------------|
| Classifier              | CNN          | Linear       | CNN          | Linear       | CNN          | Linear       | CNN        | Linear     |
| <b>≥0.6 recovery</b>    | 1,997 (0.77) | 1,816 (0.70) | 1,232 (0.48) | 1,322 (0.51) | 1,332 (0.51) | 1,377 (0.53) | 914 (0.35) | 881 (0.34) |
| <b>Perfect recovery</b> | 1,025 (0.40) | 469 (0.22)   | 526 (0.20)   | 253 (0.10)   | 470 (0.18)   | 233 (0.09)   | 360 (0.14) | 160 (0.06) |

**Table 3.** Predicting operons in whole genome and assemblies of simulated metagenomes. **≥ 0.6 recovery:** ≥ 60% genes in a predicted operon belong to a known operon; **Perfect recovery:** both precision and recall equal one. Table shows number of operons recovered, and (fraction of 2,589)

on full operon prediction, we report on the precision / recall analysis as illustrated in Figure 1. The total number of true operons in the simulated metagenome was determined to be 2,589. The results are shown in Table 3. POEM's CNN performs much better than the linear baseline method when tasked with a perfect recovery of operons. For a 0.6 or better recovery, the CNN and the baseline perform similarly. This suggests that high quality longer assemblies, perhaps from longer reads, may perform better.

[Figure 1 about here.]

## Core Functions Facilitated by Predicted Operons in Metagenomic Data

To functionally analyse operons in metagenomes we use core operons, which are described in the Background section. Briefly, core operons are weighted-edge undirected graphs that capture information about predicted orthologous operons or subsets of operons in the metagenome. The nature of the fragmented and partial nature of metagenomic data prohibits a clear binning of reads and a full assembly into component genomes. Therefore, we may not be able to provide an accurate prediction of all genes in the operons or their precise taxonomic affiliation. See Methods / Constructing Core Operons and Figure 5 for an explanation of how core operons are constructed. To see how well core operons capture the function of true operons on our different data sets, we examined the overlap of operonic genes with identical functions as shown in Figure 5. The results of this analysis is shown in Table 4.

103 To show the utility of our method in discovering core functions facilitated  
104 by predicted operons, we ran POEM on the metagenome sample SRR2155174,  
105 containing the human gut microbiome data. Figure 2A shows a core function  
106 predicted from the SRR2155174 data set. The annotations of the core functions  
107 indicates that it is related to lipid transport and metabolism. We found several  
108 predicted operons (Figure 2B-E) from the SRR2155174 data set that match  
109 the core function. Of the loci in the core operon, only lp\_1674 and lp\_1675 loci  
110 in *Lactobacillus plantarum* WCFS1 (Figure 2E) can be found in the predicted  
111 operons of Operon DataBase [29]. To find the functions of these predicted  
112 operonic genes, we examined the functional annotations for these operonic genes  
113 from GenBank [2]. The functional annotations (Supplementary Table S2) show  
114 that these operonic genes are likely to be involved in fatty acid biosynthesis. We  
115 mapped the predicted operonic genes of *Lactobacillus plantarum* WCFS1 (Figure  
116 2E) to KEGG database [19] and found most of the genes involved in fatty acid  
117 biosynthesis (Supplementary Figure S2). These results show these predicted  
118 operons are likely involved in fatty acid biosynthesis and have a high probability  
119 of being true operons. Although core operons are involved in the same biological  
120 pathway, the genes outside the core function (Figure 2B-E) are diverse. The core  
121 function reflects the conservation of operons across species and is more robust  
122 and error-tolerant than operons. Core functions may reconstruct the metabolism  
123 pathways from the incomplete genome assembly data leveraging the conservation  
124 of genes across species. The ability to use core functions as familiar ground from  
125 which to explore new conserved proximal genes makes core functions a new and  
126 powerful tool for discovering novel operon-encoded pathways in metagenomic  
127 data.

128 [Figure 2 about here.]

| Assembler       | Number of core operons | Intersection with True Operons | Mean Precision $\pm$ SE | Mean Recall $\pm$ SE | Mean $F_1 \pm$ SE |
|-----------------|------------------------|--------------------------------|-------------------------|----------------------|-------------------|
| True Operon Set |                        |                                |                         |                      |                   |
| NA              | 110                    | NA                             | $0.97 \pm 0.12$         | $0.66 \pm 0.28$      | $0.75 \pm 0.22$   |
| Genome          |                        |                                |                         |                      |                   |
| NA              | 310                    | 36                             | $0.77 \pm 0.34$         | $0.60 \pm 0.34$      | $0.67 \pm 0.28$   |
| Simulated Reads |                        |                                |                         |                      |                   |
| IDBA_ud         | 260                    | 48                             | $0.83 \pm 0.31$         | $0.61 \pm 0.33$      | $0.71 \pm 0.26$   |
| Megahit         | 256                    | 46                             | $0.84 \pm 0.31$         | $0.61 \pm 0.32$      | $0.71 \pm 0.26$   |
| Velvet          | 202                    | 56                             | $0.87 \pm 0.30$         | $0.59 \pm 0.32$      | $0.71 \pm 0.25$   |
| SRR2155174      |                        |                                |                         |                      |                   |
| IDBA_ud         | 141                    | 25                             | $0.71 \pm 0.36$         | $0.55 \pm 0.33$      | $0.65 \pm 0.24$   |
| Megahit         | 138                    | 26                             | $0.71 \pm 0.37$         | $0.54 \pm 0.33$      | $0.66 \pm 0.24$   |
| Velvet          | 94                     | 11                             | $0.72 \pm 0.39$         | $0.48 \pm 0.33$      | $0.65 \pm 0.25$   |

**Table 4.** Comparing core operons discovered by POEM in the simulated metagenome, and in SRR2155174. See Methods and Figure 5 for details. **Intersection with True Operons:** The number of shared core functions between true operons and predicted operons. **SE:** standard error.

## Discussion

In this study we introduce POEM, a complete pipeline for predicting operons in genomic and metagenomic data. We also introduce the concept of a core operon, a functional unit of proximal genes in a metagenome, which is composed of the common functions of orthologous operons. POEM's CNN predicts intra-operonic genes with high precision, considerably more so than the baseline method of a linear classifier. The recall rate of POEM is lower than that of the linear classifier, but that is expected as the linear classifier recovers all proximal genes with a distance of  $\leq 500$  bp. This means that the recall is high, but the number of false positives is also high, as indicated by the lower precision when compared to the CNN (Table 2, 69.84).

When recovering operons from metagenomes (Table 2), POEM's results depend heavily upon the choice of gene-calling software and metagenome assembly. POEM outperforms the linear baseline method indicating that higher quality assemblies and longer reads will lead to a higher overall accuracy in POEM's performance relative to the linear classifier. Furthermore, when recovering full operons, POEM's CNN outperforms the linear classifier. The recovery overall is around 39% (1025 out of 2589), but it is considerably higher than that of the

147 linear classifier (469/1,025).

148 the chief utility of POEM lies in identifying the functions carried out by the  
 149 predicted operons in a metagenome. To that end, we introduced the core operon,  
 150 identified by counting proximal predicted inter-operonic gene pairs in assembled  
 151 contigs, and concatenating them using guilt-by-association. (Figure 5). The  
 152 most frequent functions in the operons containing a large number of orthologous  
 153 genes will be represented in the core operon. A high overlap in the count of  
 154 functions (as COGs) between the core operons and the true operons indicates  
 155 that while not all genes in an operon can be recovered in a metagenome, the  
 156 basic functionality enabled by core operons can be recovered. The high precision  
 157 and recall values shown in Table 4 indicate the the use of core operons can indeed  
 158 inform us of those functions that are carried out by operons in a metagenome. In  
 159 providing a characterization of core operons and their functions, POEM allows  
 160 the annotation of a metagenome beyond the simple assignment of functions to  
 161 genes, but to incorporate a level of annotation than includes an element of gene  
 162 structure which is crucial in understanding bacterial function.

163 In sum, POEM is a novel and highly useful addition to the arsenal of tools  
 164 helping us to better understand the functionality of metagenome, and is dis-  
 165 tinguished by offering a structural view of the metagenome, rather than a  
 166 bag-of-genes-and-functions that most tools offer.

## 167 Methods

168 An overview of the POEM pipeline is shown in Fig. 3. The heart of the pipeline  
 169 lie the Operon identification and operon core structure that POEM performs.  
 170 The other steps are performed with third-party tools, and are modular. Below  
 171 we elaborate upon the various stages in the POEM pipeline.

172 [Figure 3 about here.]



## 173 Metagenome Assembly

174 POEM uses, as default, the IDBA-UD *de-novo* assembler, but the user may  
 175 supply an alternative assembler. Short read assemblers are usually based on  
 176 De Bruijn graphs and are sensitive to the sequencing depth, repetitive regions,  
 177 and sequencing errors [24]. For clonal bacteria, this assembly algorithm works  
 178 relatively because it is easy to estimate the sequencing depth and the bacte-  
 179 rial genomes are often compact and have few repetitive regions. However, in  
 180 metagenomes it is hard to estimate the amount of sequence data that are needed  
 181 for good functional coverage, and the genomes from closely related species may  
 182 contain many highly conserved genes which may be interpreted as repetitive  
 183 regions. Although *de novo* assemblers for metagenomes are still at an early  
 184 stage [40], there are several tools developed for this task including MetaVelvet-SL,  
 185 IDBA-UD, and Megahit [1, 22, 27, 30, 32]. In this study we also compare the effect  
 186 these assemblers have on the accuracy of POEM.

## 187 Gene Prediction

188 We chose to use an *ab-initio* method for gene calling, as opposed to calling by  
 189 sequence similarity. First, because *ab-initio* gene calling is faster in bacterial  
 190 and archaeal genomes, with little accuracy sacrificed: the predicted accuracy  
 191 of some methods can reach 98% [16, 17, 43, 48]. Second, metagenomic data  
 192 contain many genes with no similarity to known genes, so using a homology  
 193 based method may result in a large number of open reading frames (ORFs) that  
 194 are not predicted as such (false negatives). Several gene prediction tools have  
 195 been developed or optimized for metagenomic data, including Glimmer-MG,  
 196 Metagene, Metagenemark, Prokka, Prodigal, and Orphelia [14, 17, 20, 28, 36, 48].  
 197 POEM uses Metagenemark or Prokka to predict genes. As in the contig assembly  
 198 stage, this part can be modified by the user.

## 199 Removing ORF Redundancies

200 Once ORFs are identified, we remove redundant ORFs with an ID of >98%  
201 using CD-HIT [12, 23]. The assumption is that genes with a very high sequence  
202 ID were taken from the same species or highly similar strains and are therefore  
203 redundant information.

## 204 Gene Function Annotation

205 While there are many ways to annotate gene function [34], a fast and acceptably  
206 accurate way to do so typically employs sequence similarity matching against  
207 a reliable functionally annotated sequence database. Here we used the COG  
208 database as a reference. POEM uses both BLAST and DIAMOND [4], which  
209 trades off speed and sensitivity. The functional assignment is done by choosing  
210 the top hit in COG above the e-value threshold (  $Evalue = 10^{-3}$ ).

## 211 Operon Prediction

212 At the core of POEM lies a novel method we developed for predicting operons.  
213 POEM predicts if any given pair of adjacent genes are intra-operonic by classifying  
214 intergenic regions into intra- or extra-operonic. Thus, the operon prediction  
215 problem is cast as a binary classification problem.

216 POEM's operon prediction method goes through the following steps. First,  
217 the intergenic DNA sequences of 4,425 operonic and 2,097 non-operonic adjacent  
218 genes were extracted from Operon DataBase v2 [29]. The intergenic regions  
219 are represented as a  $k$ -mer-position matrix (KPM, Figure 4). Two-thirds of  
220 the data were used for training a Convolutional Neural Network (CNN) based  
221 binary classification model and the remaining 1/3 of the data were used as the  
222 test set. We used a CNN model from the Keras package (v1.2.0) to train the  
223 classification model [7]. Since the CNN only accepts a fixed size matrix, we  
224 convert the KPM to a fixed size matrix by truncating the middle columns or

225 adding all zero columns to the middle of the matrix. Trial-and-error has shown  
226 that  $k = 3$  produced the best accuracy (Supplementary Figure S1).

227 To show the CNN's utility, we compared its performance to a simple baseline  
228 predictor. The baseline linear classifier works as follows: if two genes on the same  
229 strand have an intergenic distance  $< 500$  nt, then their adjacency is classified  
230 as within the same operon (operonic). A larger distance would classify them as  
231 non-operonic. The predicted operonic adjacent genes were then connected to  
232 form a full operon prediction.

233 [Figure 4 about here.]

## 234 Identifying Core Operons

235 To characterize operons in metagenomes, we introduce the concept of *core operons*.  
236 Core operons are weighted-edge undirected graphs that capture information about  
237 predicted orthologous operons or fractions of operons in the metagenome. Each  
238 node is a set of orthologous genes that are all annotated by at least one common  
239 COG term. An edge is drawn between two nodes if they are determined to be  
240 an intra-operonic pair. The weight of the edge is determined by the frequency  
241 of the adjacency of the intra-operon adjacent genes. To determine how well a  
242 core operon captures the real operons in a metagenome, we ran a precision-recall  
243 analysis using the operons in the simulated database as our standard-of-truth, see  
244 Figure 5. Here, precision is the number of correctly predicted intra-operonic genes  
245 (true positives) divided by the number of all predictions (true positive and false  
246 positive predictions). Recall is the number of correctly predicted intra-operonic  
247 genes divided by the all real intra-operonic genes. Finally, POEM produces a file  
248 that can then be used by Cytoscape [37] to visualize the core operons.

249 [Figure 5 about here.]

## 250 Availability of source code and requirements

251 The software and related information are listed below:

252 **Project Name:** POEM

253 **Project Home Page:** [https://github.com/Rinoahu/POEM\\_py3k](https://github.com/Rinoahu/POEM_py3k)

254 **Operating System(s):** POEM was tested on GNU/Linux distribution  
 255 Ubuntu 16.04 64-bit, but we expect POEM to work on most Unix-like sys-  
 256 tems.

257 **Programming Language:** Python

258 **Other Requirements:** Python 3.7 and Conda

259 **License:** GPLv3

## Acknowledgments

Will be provided upon acceptance

# References

1. Afiahayati, Kengo Sato, and Yasubumi Sakakibara. MetaVelvet-SL: An extension of the Velvet assembler to a de novo metagenomic assembler utilizing supervised learning. *DNA Res.*, 22(1):69–77, 2015.
2. Dennis A. Benson, Karen Clark, Ilene Karsch-Mizrachi, David J. Lipman, James Ostell, and Eric W. Sayers. GenBank. *Nucleic Acids Res.*, 2015.
3. J. Bockhorst, M. Craven, D. Page, J. Shavlik, and J. Glasner. A Bayesian network approach to operon prediction. *Bioinformatics*, 19(10):1227–1235, jul 2003.
4. Benjamin Buchfink, Chao Xie, and Daniel H Huson. Fast and sensitive protein alignment using DIAMOND. *Nat. Methods*, 12(1):59–60, nov 2014.
5. X Chen, Z Su, P Dam, B Palenik, Y Xu, and T Jiang. Operon prediction by comparative genomics: an application to the *Synechococcus* sp. WH8102 genome. *Nucleic Acids Res.*, 32(7):2147–57, 2004.
6. Joshua L Cherry. Genome size and operon content. *Journal of theoretical biology*, 221(3):401–410, 2003.
7. François Chollet. Keras: Deep Learning library for Theano and TensorFlow, 2015.
8. Li-Yeh Chuang, Jui-Hung Tsai, and Cheng-Hong Yang. Binary particle swarm optimization for operon prediction. *Nucleic Acids Res.*, 38(12):e128, jul 2010.
9. Li-Yeh Chuang, Cheng-Huei Yang, Jui-Hung Tsai, and Cheng-Hong Yang. Operon Prediction Using Chaos Embedded Particle Swarm Optimization. *IEEE/ACM Trans. Comput. Biol. Bioinforma.*, 10(5):1299–1309, sep 2013.

10. Mark Craven, David Page, Jude Shavlik, Joseph Bockhorst, and Jeremy Glasner. A Probabilistic Learning Approach to Whole-Genome Operon Prediction. *Proc Int Conf Intell Syst Mol Biol*, 8:116–27, 2000.
11. Phuongan Dam, Victor Olman, Kyle Harris, Zhengchang Su, and Ying Xu. Operon prediction using both genome-specific and general genomic information. *Nucleic Acids Res.*, 35(1):288–298, 2007.
12. Limin Fu, Beifang Niu, Zhengwei Zhu, Sitao Wu, and Weizhong Li. CD-HIT: Accelerated for clustering the next-generation sequencing data. *Bioinformatics*, 28(23):3150–3152, 2012.
13. Socorro Gama-Castro, Heladia Salgado, Alberto Santos-Zavaleta, Daniela Ledezma-Tejeda, Luis Muñoz-Rascado, Jair Santiago García-Sotelo, Kevin Alquicira-Hernández, Irma Martínez-Flores, Lucia Pannier, Jaime Abraham Castro-Mondragón, et al. Regulondb version 9.0: high-level integration of gene regulation, coexpression, motif clustering and beyond. *Nucleic acids research*, 44(D1):D133–D143, 2016.
14. Katharina J. Hoff, Thomas Lingner, Peter Meinicke, and Maike Tech. Orphelia: Predicting genes in metagenomic sequencing reads. *Nucleic Acids Res.*, 37(SUPPL. 2), 2009.
15. Weichun Huang, Leping Li, Jason R. Myers, and Gabor T. Marth. ART: A next-generation sequencing read simulator. *Bioinformatics*, 28(4):593–594, 2012.
16. Doug Hyatt, Gwo-Liang Chen, Philip F Locascio, Miriam L Land, Frank W Larimer, and Loren J Hauser. Prodigal: prokaryotic gene recognition and translation initiation site identification. *BMC Bioinformatics*, 11:119, 2010.

17. Doug Hyatt, Philip F. Locascio, Loren J. Hauser, and Edward C. Uberbacher. Gene and translation initiation site prediction in metagenomic sequences. *Bioinformatics*, 28(17):2223–2230, 2012.
18. E. Jacob, R. Sasikumar, and K. N. R. Nair. A fuzzy guided genetic algorithm for operon prediction. *Bioinformatics*, 21(8):1403–1407, apr 2005.
19. Minoru Kanehisa and Susumu Goto. KEGG: Kyoto Encyclopedia of Genes and Genomes. *Nucleic Acids Research*, 28(1):27–30, January 2000.
20. David R. Kelley, Bo Liu, Arthur L. Delcher, Mihai Pop, and Steven L. Salzberg. Gene prediction with Glimmer for metagenomic sequences augmented by classification and clustering. *Nucleic Acids Res.*, 40(1), 2012.
21. Rasko Leinonen, Ruth Akhtar, Ewan Birney, Lawrence Bower, Ana Cerdano-Tárraga, Ying Cheng, Iain Cleland, Nadeem Faruque, Neil Goodgame, Richard Gibson, Gemma Hoad, Mikyung Jang, Nima Pakseresht, Sheila Plaister, Rajesh Radhakrishnan, Kethi Reddy, Siamak Sobhany, Petra Ten Hoopen, Robert Vaughan, Vadim Zalunin, and Guy Cochrane. The European nucleotide archive. *Nucleic Acids Res.*, 39(SUPPL. 1), 2011.
22. Dinghua Li, Chi Man Liu, Ruibang Luo, Kunihiko Sadakane, and Tak Wah Lam. MEGAHIT: An ultra-fast single-node solution for large and complex metagenomics assembly via succinct de Bruijn graph. *Bioinformatics*, 31(10):1674–1676, 2014.
23. Weizhong Li and Adam Godzik. Cd-hit: A fast program for clustering and comparing large sets of protein or nucleotide sequences. *Bioinformatics*, 22(13):1658–1659, 2006.

24. Zhenyu Li, Yanxiang Chen, Desheng Mu, Jianying Yuan, Yujian Shi, Hao Zhang, Jun Gan, Nan Li, Xuesong Hu, Binghang Liu, Bicheng Yang, and Wei Fan. Comparison of the two major classes of assembly algorithms: overlap-layout-consensus and de-bruijn-graph. *Brief. Funct. Genomics*, 11(1):25–37, jan 2012.
25. Fenglou Mao, Phuongan Dam, Jacky Chou, Victor Olman, and Ying Xu. Door: a database for prokaryotic operons. *Nucleic acids research*, 37(suppl 1):D459–D463, 2009.
26. Gabriel Moreno-Hagelsieb and Julio Collado-Vides. A powerful non-homology method for the prediction of operons in prokaryotes. *Bioinformatics*, 18 Suppl 1:S329–36, 2002.
27. Toshiaki Namiki, Tsuyoshi Hachiya, Hideaki Tanaka, and Yasubumi Sakakibara. MetaVelvet: An extension of Velvet assembler to de novo metagenome assembly from short sequence reads. *Nucleic Acids Res.*, 40(20), 2012.
28. Hideki Noguchi, Jungho Park, and Toshihisa Takagi. MetaGene: Prokaryotic gene finding from environmental genome shotgun sequences. *Nucleic Acids Res.*, 34(19):5623–5630, 2006.
29. Shujiro Okuda and Akiyasu C Yoshizawa. Odb: a database for operon organizations, 2011 update. *Nucleic acids research*, 39(suppl 1):D552–D555, 2011.
30. Anastasis Oulas, Christina Pavlodi, Paraskevi Polymenakou, Georgios A Pavlopoulos, Nikolas Papanikolaou, Georgios Kotoulas, Christos Arvanitidis, and Ioannis Iliopoulos. Metagenomics: tools and insights for analyzing next-generation sequencing data derived from biodiversity studies. *Bioinform. Biol. Insights*, 9:75–88, 2015.



31. R. Overbeek, M. Fonstein, M. D'Souza, G. D. Pusch, and N. Maltsev. The use of gene clusters to infer functional coupling. *Proceedings of the National Academy of Sciences of the United States of America*, 96(6):2896–2901, March 1999.
32. Yu Peng, Henry C M Leung, S. M. Yiu, and Francis Y L Chin. IDBA-UD: A de novo assembler for single-cell and metagenomic sequencing data with highly uneven depth. *Bioinformatics*, 28(11):1420–1428, 2012.
33. Mihaela Pertea, Kunmi Ayanbule, Megan Smedinghoff, and Steven L Salzberg. Operondb: a comprehensive database of predicted operons in microbial genomes. *Nucleic acids research*, 37(suppl 1):D479–D482, 2009.
34. Predrag Radivojac, Wyatt T Clark, Tal Ronnen Oron, Alexandra M Schnoes, Tobias Wittkop, Artem Sokolov, Kiley Graim, Christopher Funk, Karin Verspoor, Asa Ben-Hur, et al. A large-scale evaluation of computational protein function prediction. *Nature methods*, 10(3):221, 2013.
35. C. Sabatti, Lars Rohlin, Min-Kyu Oh, and James C. Liao. Co-expression pattern from DNA microarray experiments as a tool for operon prediction. *Nucleic Acids Res.*, 30(13):2886–2893, jul 2002.
36. Torsten Seemann. Prokka: rapid prokaryotic genome annotation. *Bioinformatics*, 30(14):2068–2069, 03 2014.
37. Paul Shannon, Andrew Markiel, Owen Ozier, Nitin S. Baliga, Jonathan T. Wang, Daniel Ramage, Nada Amin, Beno Schwikowski, and Trey Ideker. Cytoscape: A software Environment for integrated models of biomolecular interaction networks. *Genome Res.*, 13(11):2498–2504, 2003.
38. Blanca Taboada, Ricardo Ciria, Cristian E Martinez-Guerrero, and Enrique Merino. Proopdb: prokaryotic operon database. *Nucleic acids research*, 40(D1):D627–D631, 2012.

39. Blanca Taboada, Cristina Verde, and Enrique Merino. High accuracy operon prediction method based on STRING database scores. *Nucleic Acids Res.*, 38(12):e130, jul 2010.
40. Torsten Thomas, Jack Gilbert, and Folker Meyer. Metagenomics - a guide from sampling to data analysis. *Microbial Informatics and Experimentation*, 2(1):3, February 2012.
41. Gregory Vey and Trevor C. Charles. Metaprox: the database of metagenomic proximons. *Database : the journal of biological databases and curation*, 2014, 2014.
42. Gregory Vey and Gabriel Moreno-Hagelsieb. Metagenomic annotation networks: Construction and applications. *PLoS One*, 7(8), 2012.
43. Zhuo Wang, Yazhu Chen, and Yixue Li. A brief review of computational gene prediction methods. *Genomics, proteomics Bioinforma. / Beijing Genomics Inst.*, 2(4):216–21, 2004.
44. Yuri I Wolf, Igor B Rogozin, Alexey S Kondrashov, and Eugene V Koonin. Genome alignment, evolution of prokaryotic genome organization, and prediction of gene function using genomic context. *Genome research*, 11(3):356–372, 2001.
45. John C. Wooley, Adam Godzik, and Iddo Friedberg. A Primer on Metagenomics. *PLoS Comput. Biol.*, 6(2):e1000667, feb 2010.
46. Syed Shujaat Ali S. Zaidi and Xuegong Zhang. Computational operon prediction in whole-genomes and metagenomes. *Briefings in functional genomics*, September 2016.
47. Daniel R. Zerbino and Ewan Birney. Velvet: Algorithms for de novo short read assembly using de Bruijn graphs. *Genome Res.*, 18(5):821–829, 2008.

48. Wenhan Zhu, Alexandre Lomsadze, and Mark Borodovsky. Ab initio gene identification in metagenomic sequences. *Nucleic Acids Res.*, 38(12), 2010.

## List of Figures

|   |                                                                                                                                                                                                                                                                                                                                                                                                                                                                                                                                                                |    |
|---|----------------------------------------------------------------------------------------------------------------------------------------------------------------------------------------------------------------------------------------------------------------------------------------------------------------------------------------------------------------------------------------------------------------------------------------------------------------------------------------------------------------------------------------------------------------|----|
| 1 | Determining precision and recall for a predicted operon. . . . .                                                                                                                                                                                                                                                                                                                                                                                                                                                                                               | 21 |
| 2 | <b>Mapping core functions to predicted operons.</b> <b>A:</b> predicted core function from SRR2155174 data set; <b>B-E:</b> predicted operons in different species. the arrows stand for the strands of genes, box color is the COG functional classification; gray boxes are functions outside the core operon. Gene names are above the boxes. . . . .                                                                                                                                                                                                       | 22 |
| 3 | A flowcart of the POEM pipeline. A: assembly; B: Gene calling; C: similarity clustering; D: identify intra-operonic genes; E: identify core operons; F: graph-based visualization . . . . .                                                                                                                                                                                                                                                                                                                                                                    | 23 |
| 4 | <b>A.</b> Construction of a $k$ -mer-position matrix, shown with a 2-mer example (POEM uses 3-mer). Each row is a $k$ -mer and the column number stands for a position in the sequence. If a specific $k$ -mer appears in the sequence, the corresponding cell of the KPM is set to 1, otherwise, 0; <b>B.</b> training and building an CNN based classification model from intergenic of operonic and non-operonic adjacency. . . . .                                                                                                                         | 24 |
| 5 | <b>Identifying Core Operons.</b> <b>A:</b> find orthologous COG-annotated proximal gene pairs and concatenate them using guilt-by-association. <b>B:</b> The resulting graph shows the <i>core function</i> (four different COG IDs) <b>C:</b> Find the most similar operon in the dataset of gold standards and its corresponding GO annotations. In this example, there are 3 true positives (COG4806, COG1070, and COG0235), 1 false positive (COG2160), and 2 false negatives (COG2814 & COG3254). Precision is therefore 0.75 and recall is 0.6 . . . . . | 25 |

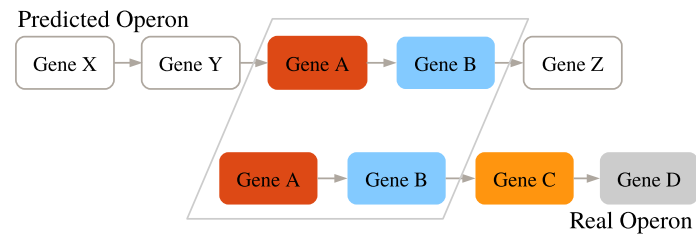

$$Precision = \frac{TP}{TP + FP} = \frac{2}{5} = 0.4 \quad \quad \quad Recall = \frac{TP}{TP + FN} = \frac{2}{4} = 0.5$$

**Figure 1.** Determining precision and recall for a predicted operon.

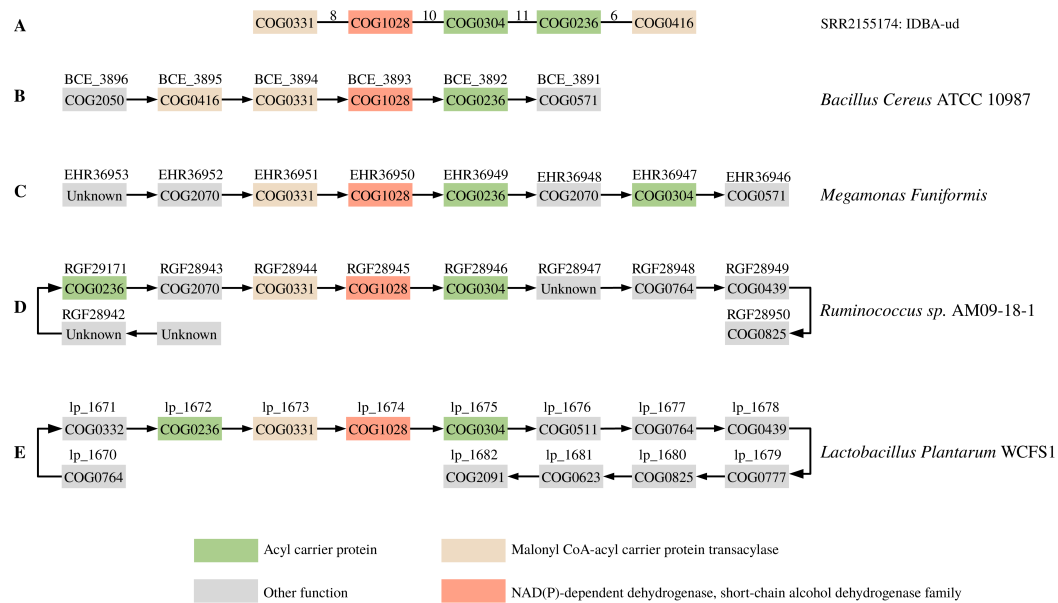

**Figure 2. Mapping core functions to predicted operons.** **A:** predicted core function from SRR2155174 data set; **B-E:** predicted operons in different species. the arrows stand for the strands of genes, box color is the COG functional classification; gray boxes are functions outside the core operon. Gene names are above the boxes.

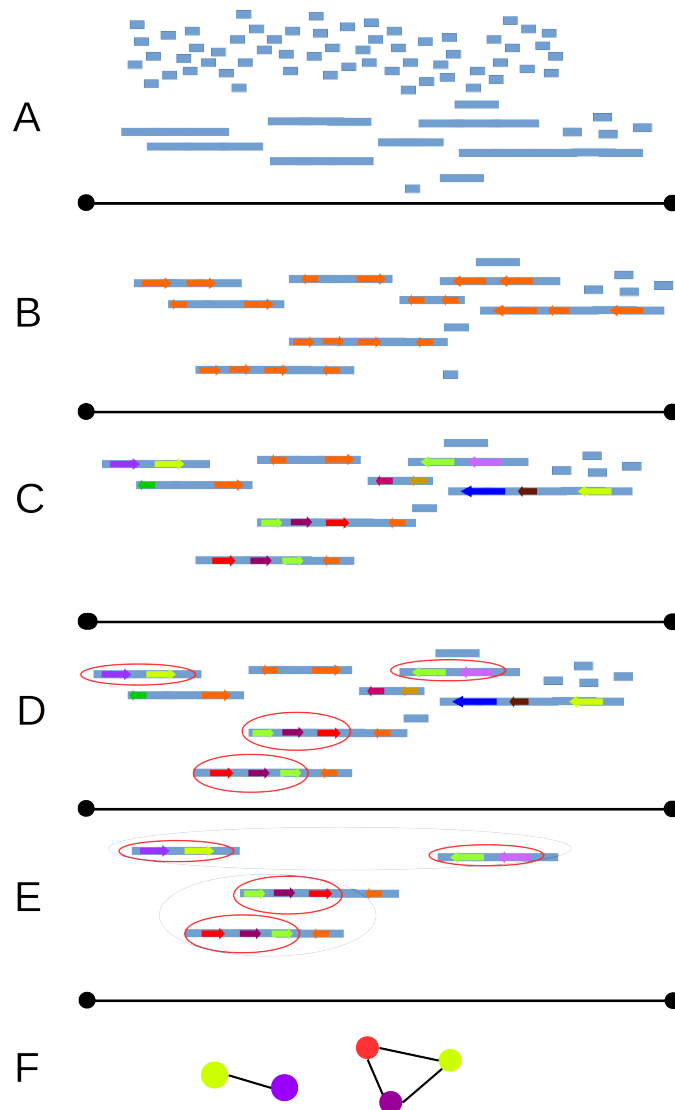

**Figure 3.** A flowchart of the POEM pipeline. A: assembly; B: Gene calling; C: similarity clustering; D: identify intra-operonic genes; E: identify core operons; F: graph-based visualization

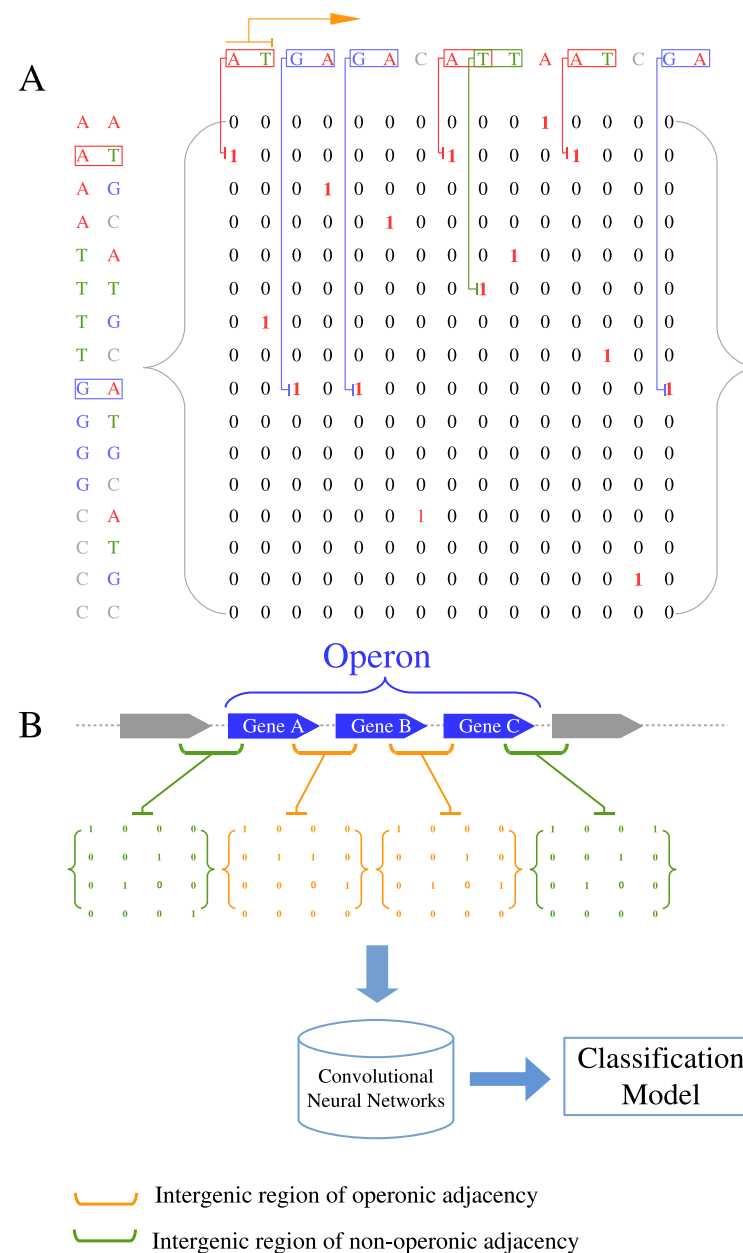

**Figure 4.** **A.** Construction of a  $k$ -mer-position matrix, shown with a 2-mer example (POEM uses 3-mer). Each row is a  $k$ -mer and the column number stands for a position in the sequence. If a specific  $k$ -mer appears in the sequence, the corresponding cell of the KPM is set to 1, otherwise, 0; **B.** training and building an CNN based classification model from intergenic of operonic and non-operonic adjacency.



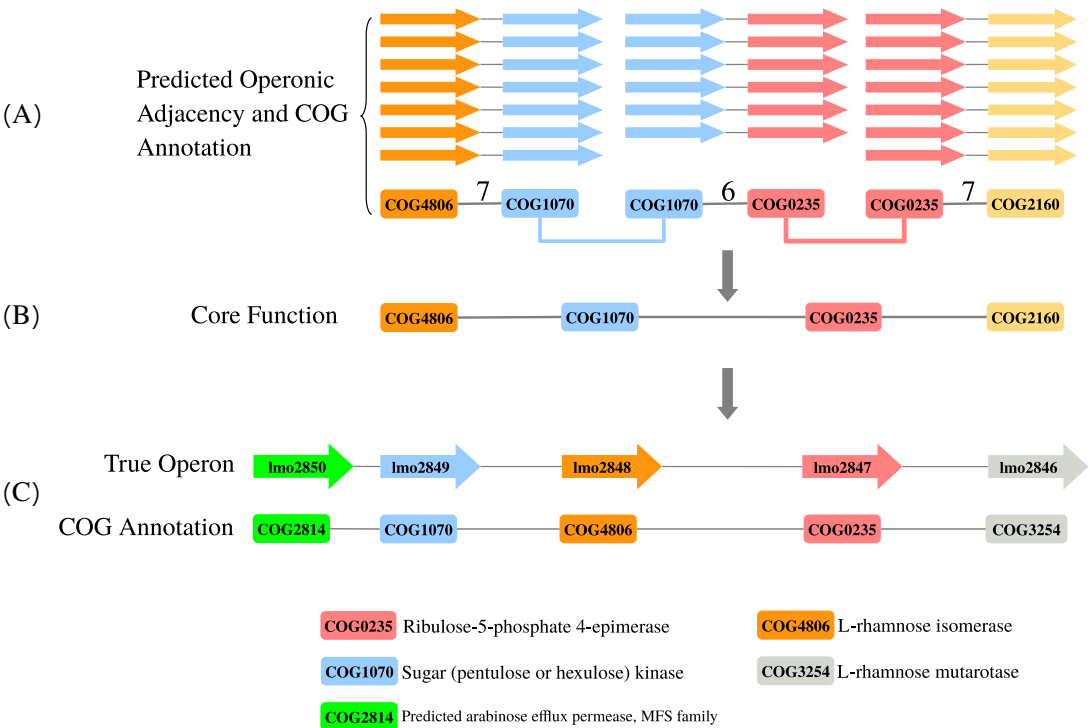

**Figure 5. Identifying Core Operons.** **A:** find orthologous COG-annotated proximal gene pairs and concatenate them using guilt-by-association. **B:** The resulting graph shows the *core function* (four different COG IDs) **C:** Find the most similar operon in the dataset of gold standards and its corresponding GO annotations. In this example, there are 3 true positives (COG4806, COG1070, and COG0235), 1 false positive (COG2160), and 2 false negatives (COG2814 & COG3254). Precision is therefore 0.75 and recall is 0.6
